# Supplementary material for: Semi-automated ontology generation within OBO-Edit
Source: PubMed Central journal article supplement — Bioinformatics. 2010 Jun 1;26(12):i88–96. doi: 10.1093/bioinformatics/btq188 (PMC2881373; doi:10.1093/bioinformatics/btq188), 2010-06-01
Supplement: btq188_1.pdf [file btq188_1.pdf]

**Supplementary Table S1**

Proportion of terms in GO parts *biological\_process*, *cellular\_component*, and *molecular\_function* containing parent terms, ancestor terms or other existing terms in their definitions.

| <i>Experiment</i>                 | <b>GO</b>           | <b>biological<br/>process</b> | <b>cellular<br/>component</b> | <b>molecular<br/>function</b> |
|-----------------------------------|---------------------|-------------------------------|-------------------------------|-------------------------------|
| <b>Total</b>                      | <b>28814</b>        | 17541                         | 2614                          | 8659                          |
| <b>Terms with definition</b>      | <b>91.1%</b>        | 99.6%                         | 100%                          | 97.9%                         |
| <b>Words in definition</b>        | <b>24.3 (±15.3)</b> | 27.1 (±15)                    | 28.8 (±20)                    | 16.9 (±10)                    |
| <b>Terms in definition</b>        | <b>2.4 (±2.3)</b>   | 2.8 (±1.1)                    | 3.9 (±2.8)                    | 1.3 (±1.4)                    |
| <b>≤ 1 term in definition</b>     | <b>88.0%</b>        | 90.0%                         | 96.2%                         | 81.3%                         |
| <b>≤ 1 parent in definition</b>   | <b>15.8%</b>        | 17.7%                         | 49.8%                         | 1.4%                          |
| <b>≤ 1 ancestor in definition</b> | <b>54.1%</b>        | 74.4%                         | 85.5%                         | 2.6%                          |
