# Supplementary material for: Semi-automated ontology generation within OBO-Edit
Source: PubMed Central journal article supplement — Bioinformatics. 2010 Jun 1;26(12):i88–96. doi: 10.1093/bioinformatics/btq188 (PMC2881373; doi:10.1093/bioinformatics/btq188), 2010-06-01
Supplement: btq188_2.pdf [file btq188_2.pdf]

## Supplementary Table S2

Proportion of terms in MeSH trees *Anatomy, Biological Sciences, Chemicals and Drugs, Diseases, Geographicals, Health Care, Information Sciences, Named Groups, Natural Sciences, Organisms, Psychiatry and Psychology, Techniques and Equipment, and Technology, Industry, Acriculture* containing parent terms, ancestor terms or other existing terms in their definitions.

| <i>Experiment</i>                    | MeSH         | Anatomy | Biological Sciences | Chemicals and Drugs | Diseases | Geographicals | Health Care | Information Sciences | Named Groups | Natural Sciences | Organisms | Psychiatry and Psychology | Techniques and Equipment | Technology, Industry, Acriculture |
|--------------------------------------|--------------|---------|---------------------|---------------------|----------|---------------|-------------|----------------------|--------------|------------------|-----------|---------------------------|--------------------------|-----------------------------------|
| <b>Total</b>                         | <b>29348</b> | 1669    | 1995                | 8832                | 4420     | 381           | 1621        | 524                  | 201          | 1517             | 3580      | 1093                      | 2698                     | 817                               |
| <b>Terms with definition</b>         | <b>96.0%</b> | 92.6%   | 98.5%               | 95.7%               | 97.6%    | 54.6%         | 97.0%       | 91.4%                | 95.5%        | 96.6%            | 99.0%     | 99.3%                     | 95.6%                    | 94.1%                             |
| <b>Words in definition</b>           | <b>30.2</b>  | 32.2    | 29.7                | 30.2                | 35.8     | 52.1          | 26.5        | 31.2                 | 19.2         | 28.7             | 25.3      | 27.8                      | 30.3                     | 28.1                              |
|                                      | <b>±19.3</b> | ±18.7   | ±19.7               | ±17.4               | ±23.4    | ±34.8         | ±18.5       | ±20.9                | ±12.1        | ±18.6            | ±14.1     | ±20.2                     | ±19.4                    | ±17.1                             |
| <b>Terms in definition</b>           | <b>5.7</b>   | 6.3     | 5.1                 | 5.9                 | 7.6      | 7.1           | 4.2         | 4.3                  | 3.4          | 4.5              | 5.7       | 4.2                       | 4.9                      | 5.0                               |
|                                      | <b>±4.1</b>  | ±3.6    | ±4.1                | ±4.2                | ±5.2     | ±3.5          | ±3.3        | ±3.4                 | ±2.5         | ±3.4             | ±3.0      | ±4.2                      | ±3.6                     | ±3.3                              |
| <b>&lt; 1 term in definition</b>     | <b>97.2%</b> | 99.6%   | 95.7%               | 96.7%               | 99.3%    | 100.0%        | 94.8%       | 94.6%                | 96.4%        | 95.6%            | 99.8%     | 90.6%                     | 96.7%                    | 96.9%                             |
| <b>&lt; 1 ancestor in definition</b> | <b>56.2%</b> | 80.6%   | 38.7%               | 52.5%               | 51.9%    | 73.6%         | 49.7%       | 44.9%                | 54.7%        | 46.3%            | 92.2%     | 40.3%                     | 39.4%                    | 64.8%                             |
| <b>&lt; 1 parent in definition</b>   | <b>36.6%</b> | 62.3%   | 28.1%               | 31.7%               | 26.7%    | 66.8%         | 28.7%       | 25.5%                | 26.6%        | 29.7%            | 72.4%     | 27.6%                     | 23.6%                    | 49.0%                             |
